# Supplementary material for: Calculation of an Improved Stiffness Index Using Decomposed Radial Pulse and Digital Volume Pulse Signals
Source: MDPI journal article supplement (doi:10.3390/jpm12111768), 2022-10-26
Supplement: s1 [file s1]

### Supplementary Materials

**Table S1.** Comparison of stiffness indices (SIs) based on digital volume pulse from original pulse wave and IMF5 after EEMD [13,14].

| Healthy Subject | Age | Height (m) | $\Delta T$ (sec) | SI (m/sec) | $\Delta T$ with IMF5 | SI with IMF5 |
|-----------------|-----|------------|------------------|------------|----------------------|--------------|
| A               | 24  | 1.73       | 0.235            | 7.36       | 0.205                | 8.44         |
| B               | 52  | 1.70       | 0.180            | 9.44       | 0.231                | 7.36*        |
| C               | 63  | 1.65       | 0.160            | 10.30      | 0.248                | 6.65*        |

\* According to definition of arterial stiffness, the older subjects had higher SI values.

**Table S2.** Stiffness index values based on pressure pulse among four different groups [15];  $\Delta T$  defined as in Figure 1 using only IMF5.

| Parameter            | Younger subjects | Older subjects  | Well-controlled diabetes | Poorly controlled diabetes |
|----------------------|------------------|-----------------|--------------------------|----------------------------|
| SI for IMF5, (m/sec) | $4.83 \pm 0.63$  | $3.52 \pm 0.66$ | $3.22 \pm 0.41^{\#}$     | $2.77 \pm 0.58^{\#}$       |

<sup>#</sup> According to definition of arterial stiffness, the subjects with T2DM should have significantly higher SI values.
